# Supplementary material
Source: PubMed Central journal article supplement (PMC3987859)
Supplement: NIHMS568650-supplement-Supplemental_Table_1.pdf [file NIHMS568650-supplement-Supplemental_Table_1.pdf]

1 Supplementary Table 1:

2

|  | UPENN<br>Collection ID# | FAB or<br>WHO | Cytogenetics              | Flt3      | Sample type |
|--|-------------------------|---------------|---------------------------|-----------|-------------|
|  |                         |               |                           |           |             |
|  | 2522                    | M4            | NA                        | ITD       | Pheresis    |
|  | 1255                    | M5            | NA                        | WT        | Pheresis    |
|  | 1751                    | M5a           | 46,XY,t(3;9)(p14;p21)[20] | WT        | Pheresis    |
|  | 2293                    | M4            | 46, XY                    | ITD       | Pheresis    |
|  | 1892                    | NOS           | 46, XY                    | WT        | Pheresis    |
|  | 2339                    | NOS           | NA                        | WT        | Pheresis    |
|  | 990                     | Inv16         | NA                        | WT        | Pheresis    |
|  | 1956                    | M4            | 47,XX,+8[8]/46,XX[14]     | ITD       | Pheresis    |
|  | 1245                    | M4            | 46, XY                    | ITD       | Pheresis    |
|  | 1566                    | M5a           | NA; FISH +7q31            | WT        | Pheresis    |
|  | 2471                    | NOS           | NA                        | ITD       | PB-MNC      |
|  | 2863                    | 2ndary#       | NA                        | WT        | PB-MNC      |
|  | 2943                    | NOS           | NA                        | ITD/D835* | Pheresis    |
|  | 983                     | M5a           | 46, XY                    | D835      | Pheresis    |

3
